# Supplementary material for: Electromembrane Extraction of Highly Polar Compounds: Analysis of Cardiovascular Biomarkers in Plasma
Source: MDPI journal article supplement (doi:10.3390/metabo10010004), 2019-12-18
Supplement: s1 [file s1]

**Table S.1: Selected reaction monitoring transitions and collision energies used in the Fast-LC-MS/MS platform**

| Compounds                              | Precursor ion | Product ion | Collision energy |
|----------------------------------------|---------------|-------------|------------------|
| <b>Betaine</b>                         | 118.1         | 58.2        | 30 eV            |
| <b>Betaine-d<sub>9</sub></b>           | 127.1         | 66.1        |                  |
| <b>L-Carnitine</b>                     | 162.3         | 85.1        | 25 eV            |
| <b>L-Carnitine-d<sub>3</sub></b>       | 165.3         | 85.1        |                  |
| <b>Choline</b>                         | 104.2         | 60.1        | 25 eV            |
| <b>Choline-d<sub>4</sub></b>           | 108.2         | 60.1        |                  |
| <b>DeoxyL-carnitine</b>                | 146.2         | 87.1        | 20 eV            |
| <b>Deoxy-L-carnitine-d<sub>9</sub></b> | 155.2         | 87.1        |                  |
| <b>TMAO</b>                            | 76.1          | 58.1        | 25 eV            |
| <b>TMAO-d<sub>9</sub></b>              | 85.1          | 66.1        |                  |
