# Supplementary material for: Electromembrane Extraction of Highly Polar Compounds: Analysis of Cardiovascular Biomarkers in Plasma
Source: MDPI journal article supplement (doi:10.3390/metabo10010004), 2019-12-18
Supplement: s1 [file s1]

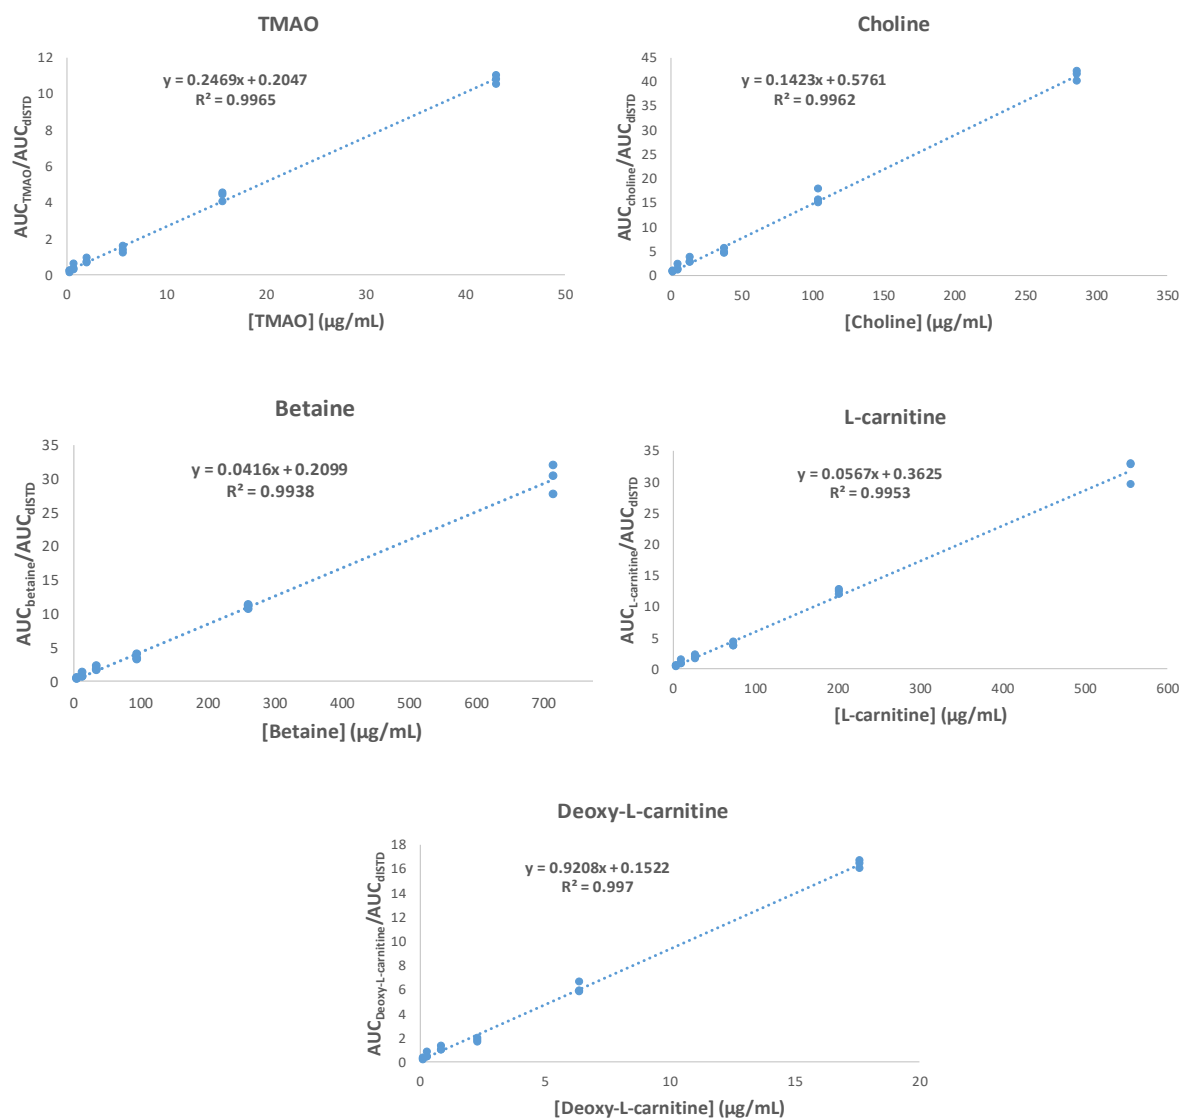

**Figure S.2: Calibration curves obtained for TMAO, choline, betaine, L-carnitine and deoxy-L-carnitine**
